# Supplementary material
Source: Springer Nature journal article supplement (https://www.springermedizin.de/resource/supplementary/12887_2010_376_MOESM2_ESM.pdf/9474980)
Supplement: MOESM2 [file 9474980]

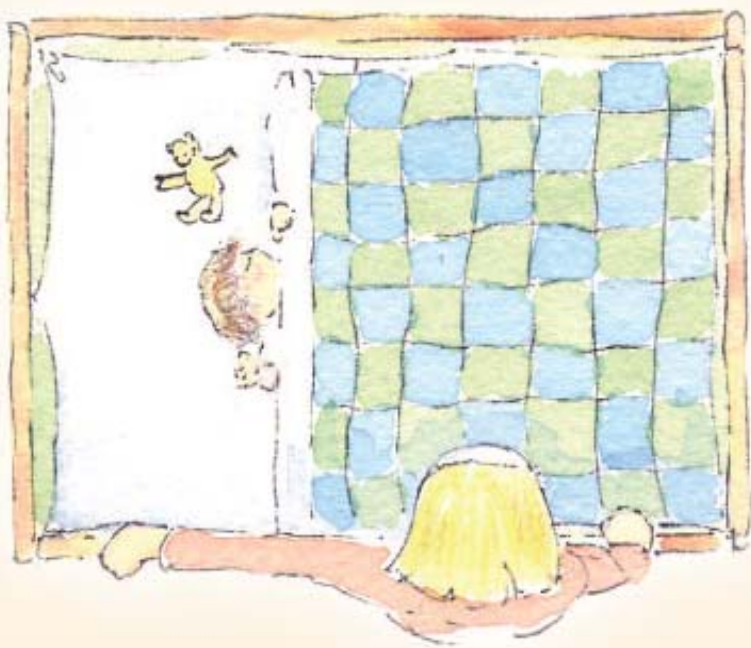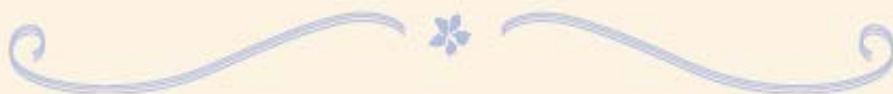

I have just come from putting my 13-month old baby to bed for the night. I took extra time tonight to rock him to sleep. I listened to the sound of his breathing. I watched the steady movement of his chest as he breathed in and out. After what we have been through this last week, I find that I want to enjoy the small things we often take for granted.
